# Supplementary material for: Indirubin-3′-oxime stimulates chondrocyte maturation and longitudinal bone growth via activation of the Wnt/β-catenin pathway
Source: PubMed Central journal article supplement (PMC6802626; doi:10.1038/s12276-019-0306-3), 2019-09-12
Supplement: 12276_2019_306_MOESM1_ESM.pdf [file 12276_2019_306_MOESM1_ESM.pdf]

## Supplementary Information

### **Indirubin 3'-oxime stimulates chondrocyte maturation and longitudinal bone growth via activation of the Wnt/ $\beta$ -catenin pathway**

Sehee Choi<sup>1,2</sup>, Pu-Hyeon Cha<sup>1,2</sup>, Hyun-Yi Kim<sup>1,2</sup>, Kang-Yell Choi<sup>1,2,3\*</sup>

<sup>1</sup>Translational Research Center for Protein Function Control, Yonsei University, Seoul, Korea.

<sup>2</sup>Department of Biotechnology, College of Life Science and Biotechnology, Yonsei University, Seoul, Korea.

<sup>3</sup>CK Biotechnology Inc., Rm 417, Engineering Research Park, 50 Yonsei Ro, Seodaemun-Gu, Seoul 03722, Korea.

\* Corresponding author:

Kang-Yell Choi

Department of Biotechnology, College of Life Science and Biotechnology, Yonsei University

50 Yonsei Ro, Seodaemun-Gu

Seoul, Korea 120-749

e-mail: kychoi@yonsei.ac.kr (Tel: +82-2-2123-6592, Fax: +82-2-2123-8284)

## Supplementary Figure S1

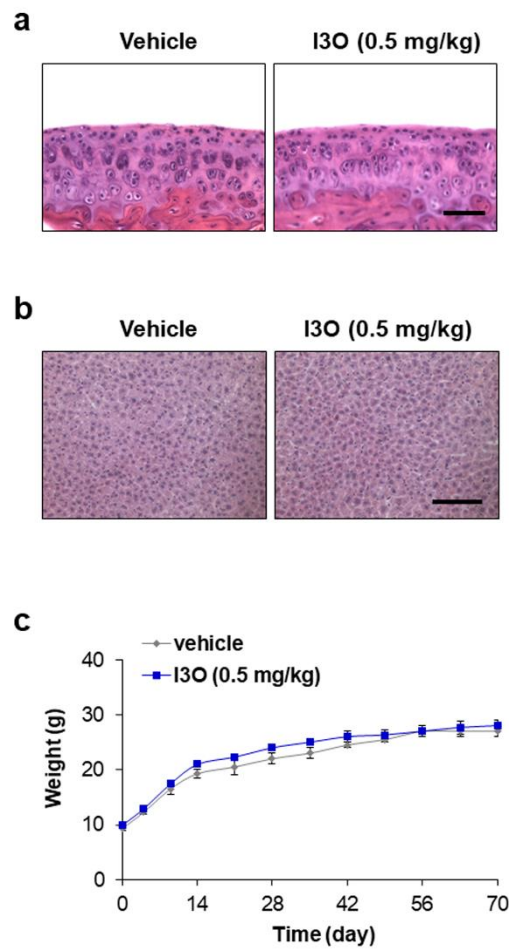

**Supplementary Fig. S1. I3O treatment does not cause critical abnormalities in liver, articular cartilage, and weight.**

**a–c** The data shown were obtained from the same mice that were examined in Figure 5. Articular cartilage (**a**) and liver (**b**) tissues were stained with H&E. Throughout I3O treatment, animal weight was measured every 5 or 7 days (mean  $\pm$  s.e.m.,  $n=13$  per group) (**c**). Scale bars, 0.1 mm.
